# Supplementary material for: Molecular interaction studies on ellagic acid for its anticancer potential targeting pyruvate dehydrogenase kinase 3
Source: PubMed Central journal article supplement — RSC Adv. 2019 Jul 29;9(40):23302–15. doi: 10.1039/c9ra02864a (PMC9067284; doi:10.1039/c9ra02864a), 2019-07-29
Supplement: RA-009-C9RA02864A-s001.pdf [file RA-009-C9RA02864A-s001.pdf]

# **Molecular interaction studies on ellagic acid for its anticancer potential targeting pyruvate dehydrogenase kinase 3**

Rashmi Dahiya<sup>a</sup>, Taj Mohammad<sup>a</sup>, Preeti Gupta<sup>a</sup>, Anzarul Haque<sup>a</sup>, Mohamed F. Alajmi<sup>b</sup>, Afzal Hussain<sup>b</sup> and Md. Imtaiyaz Hassan<sup>a,\*</sup>

<sup>a</sup>*Centre for Interdisciplinary Research in Basic Sciences, Jamia Millia Islamia, Jamia Nagar, New Delhi 10025, INDIA.*

<sup>b</sup>*Department of Pharmacognosy College of Pharmacy, King Saud University, Riyadh 11451 KSA.*

**RSC Advances: RA-REV-04-2019-  
002864.R2**

\*E-mail: [mihassan@jmi.ac.in](mailto:mihassan@jmi.ac.in)

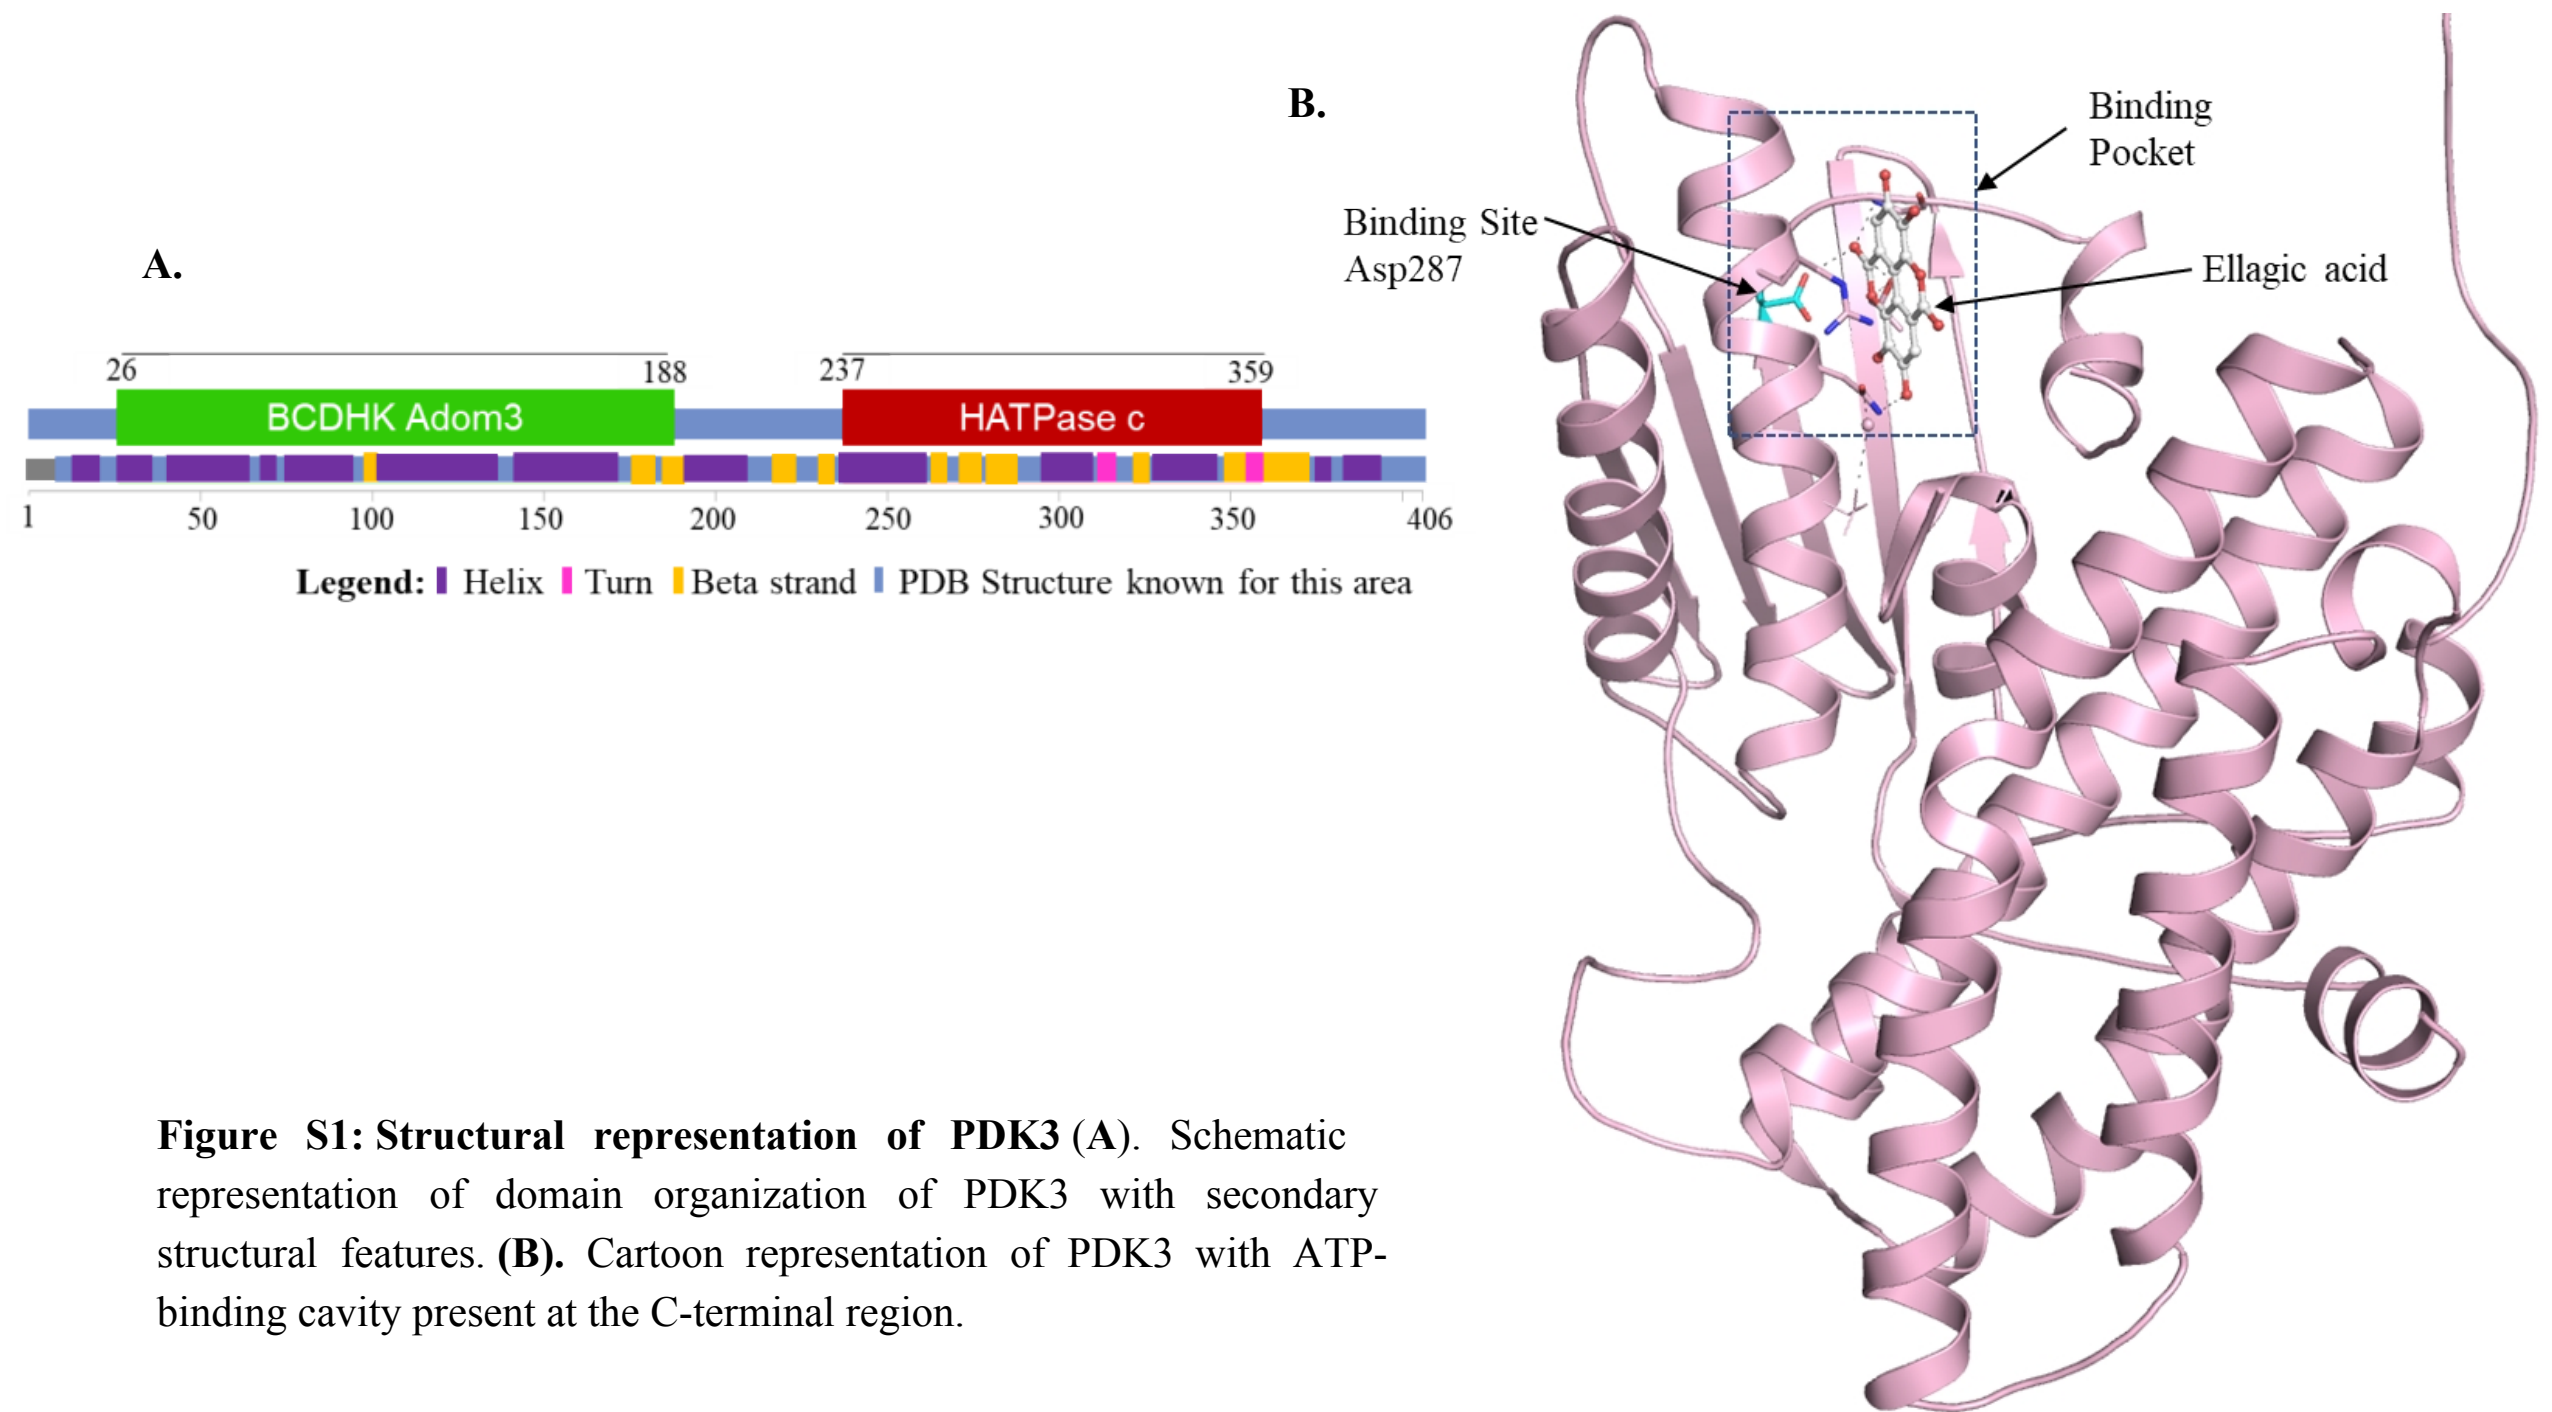

A.

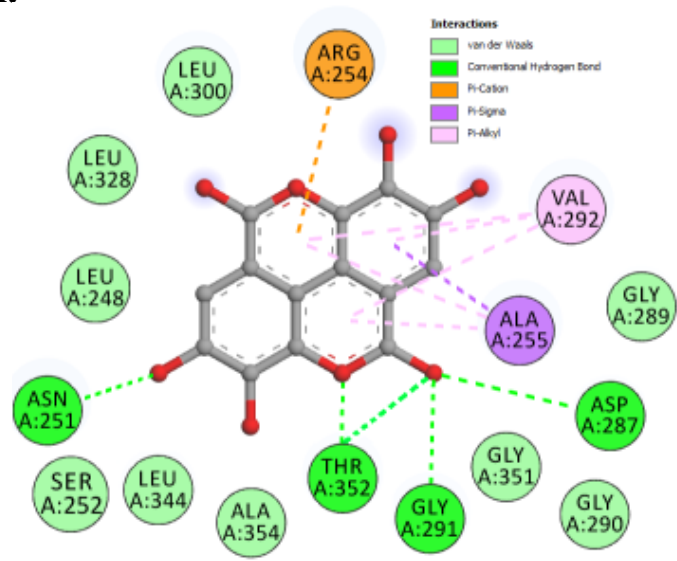

B.

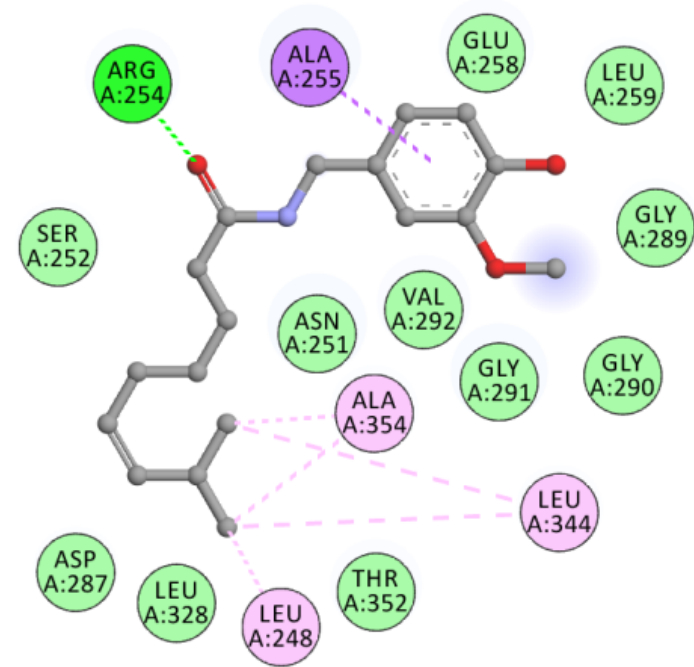

C.

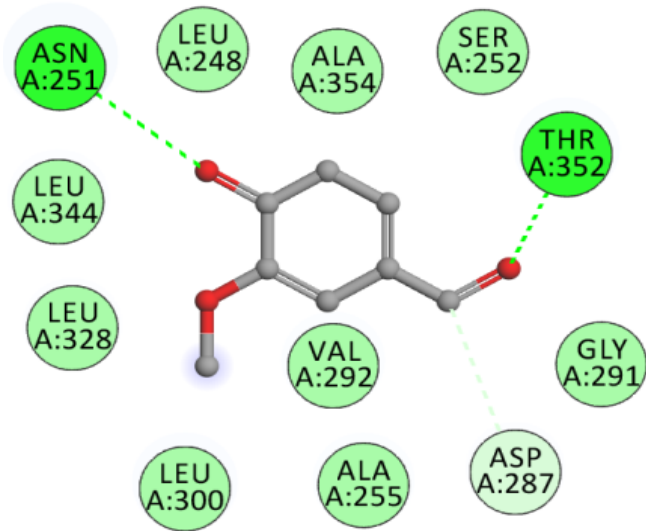

D.

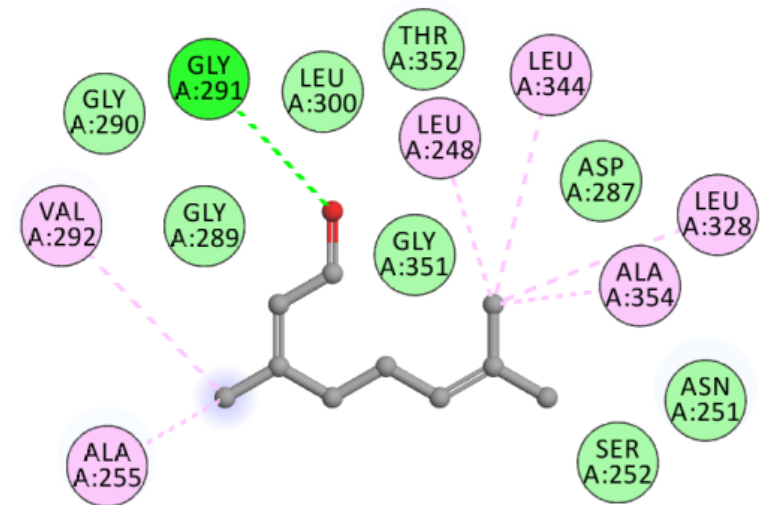

**Figure S2:** 2D representation of PDK3 residues interacting to (A) Ellagic Acid (B) Capsaicin (C) Vanillin (D) Citral

A.

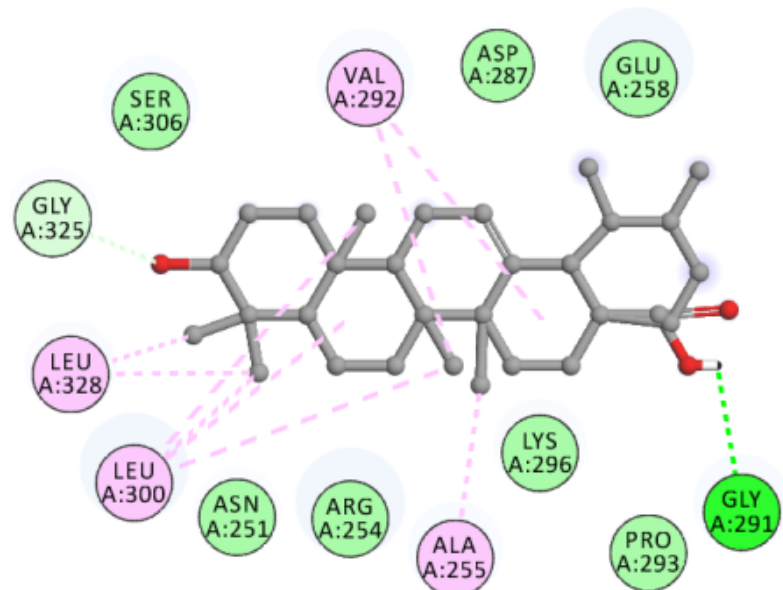

B.

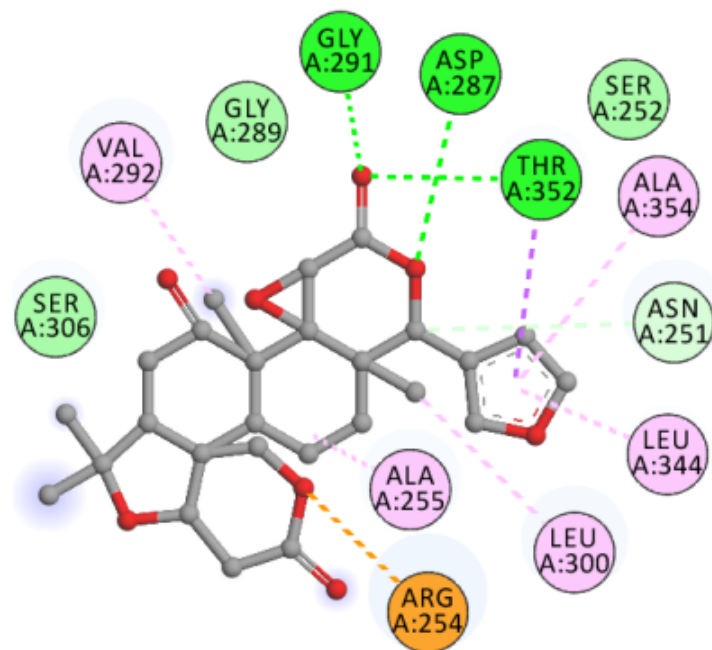

C.

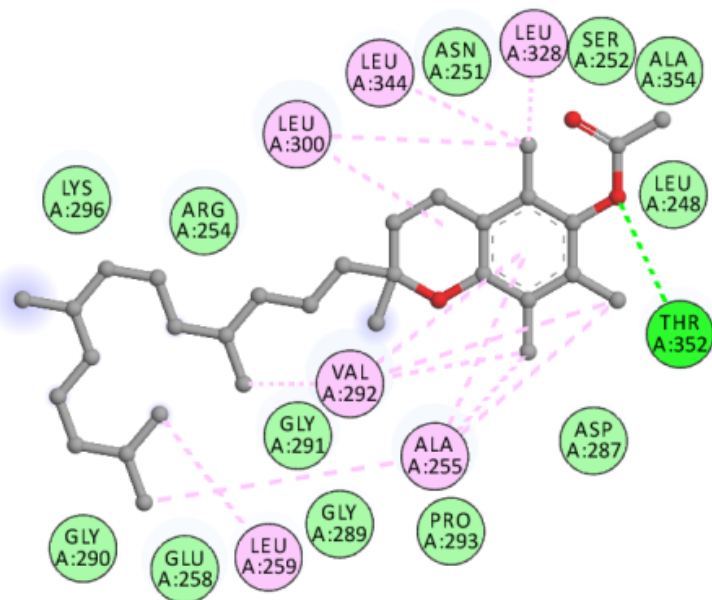

D.

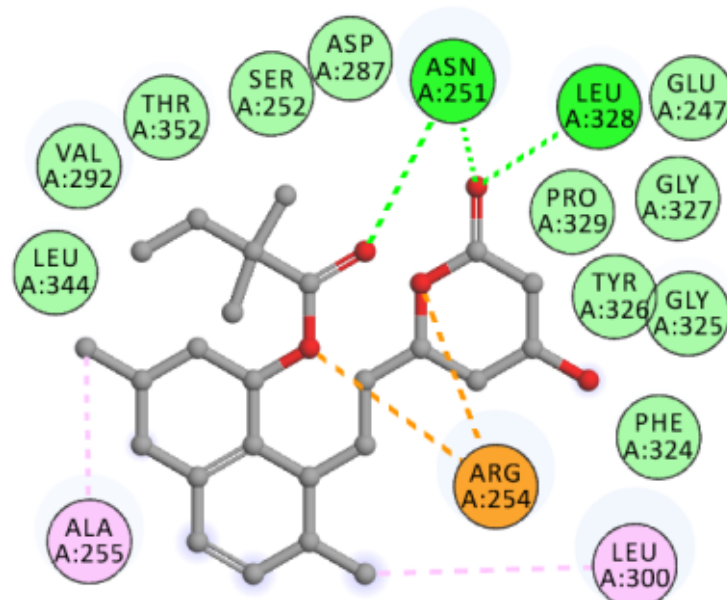

**Figure S3: 2D representation of PDK3 residues interacting to (A) Ursolic Acid (B) Limonin (C) DL- $\alpha$  tocopherol acetate (D) Simvastatin.**

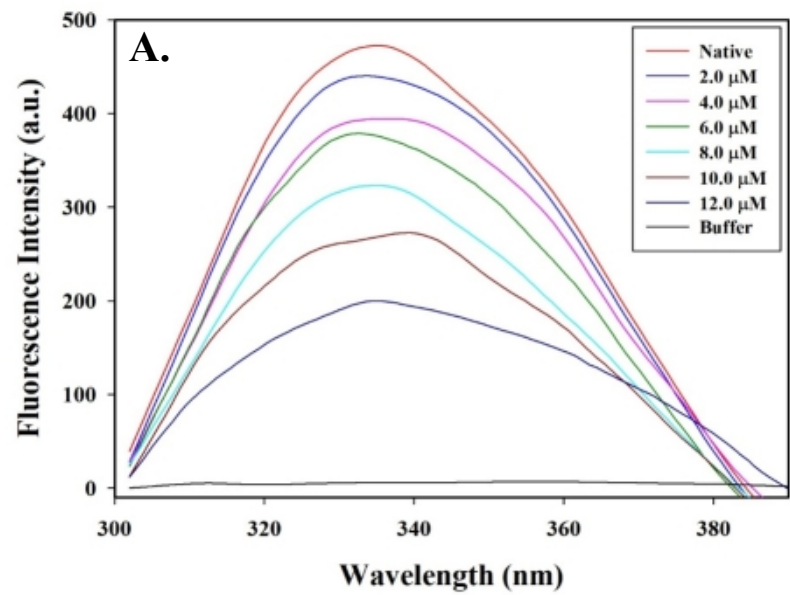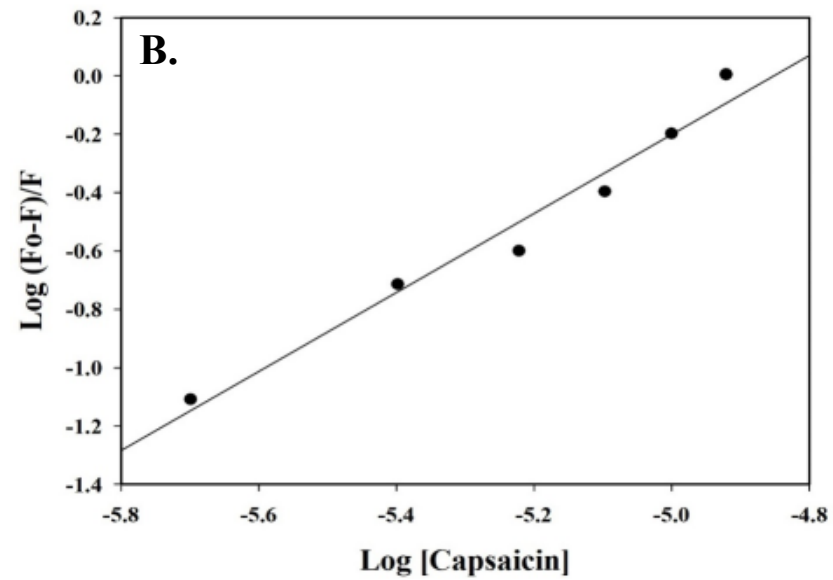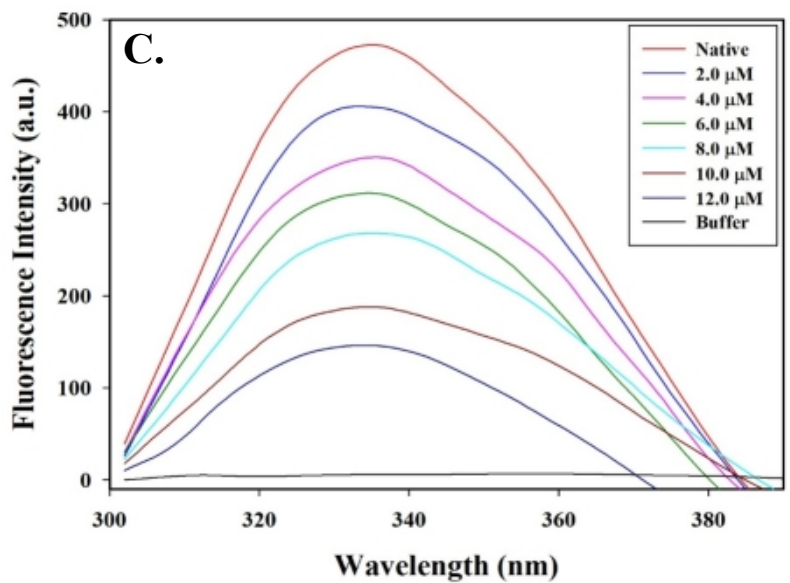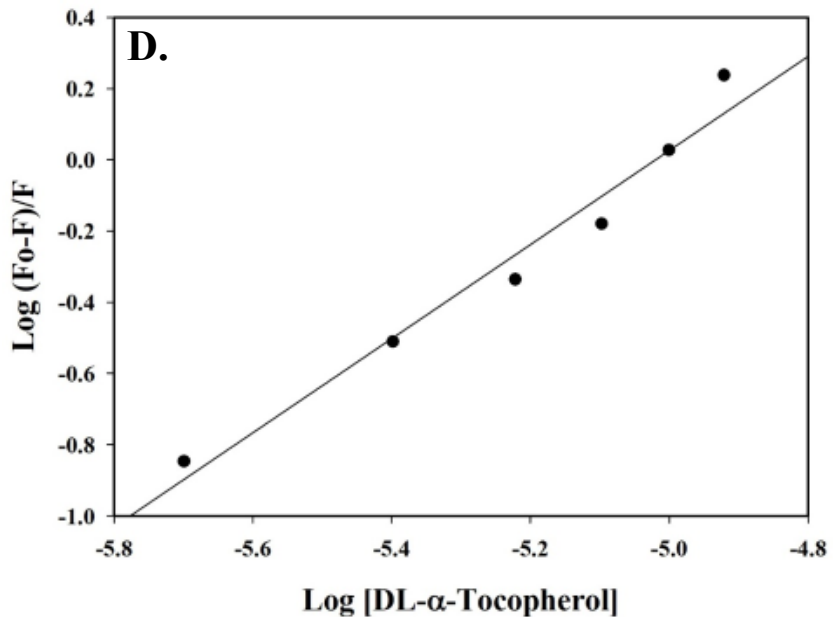

**Figure S4:** Fluorescence emission spectrum of (A) Capsaicin and (C) DL- $\alpha$ -Tocopherol. Stern Volmer plot of (B) Capsaicin and (D) DL-Tocopherol binding to the PDK3.

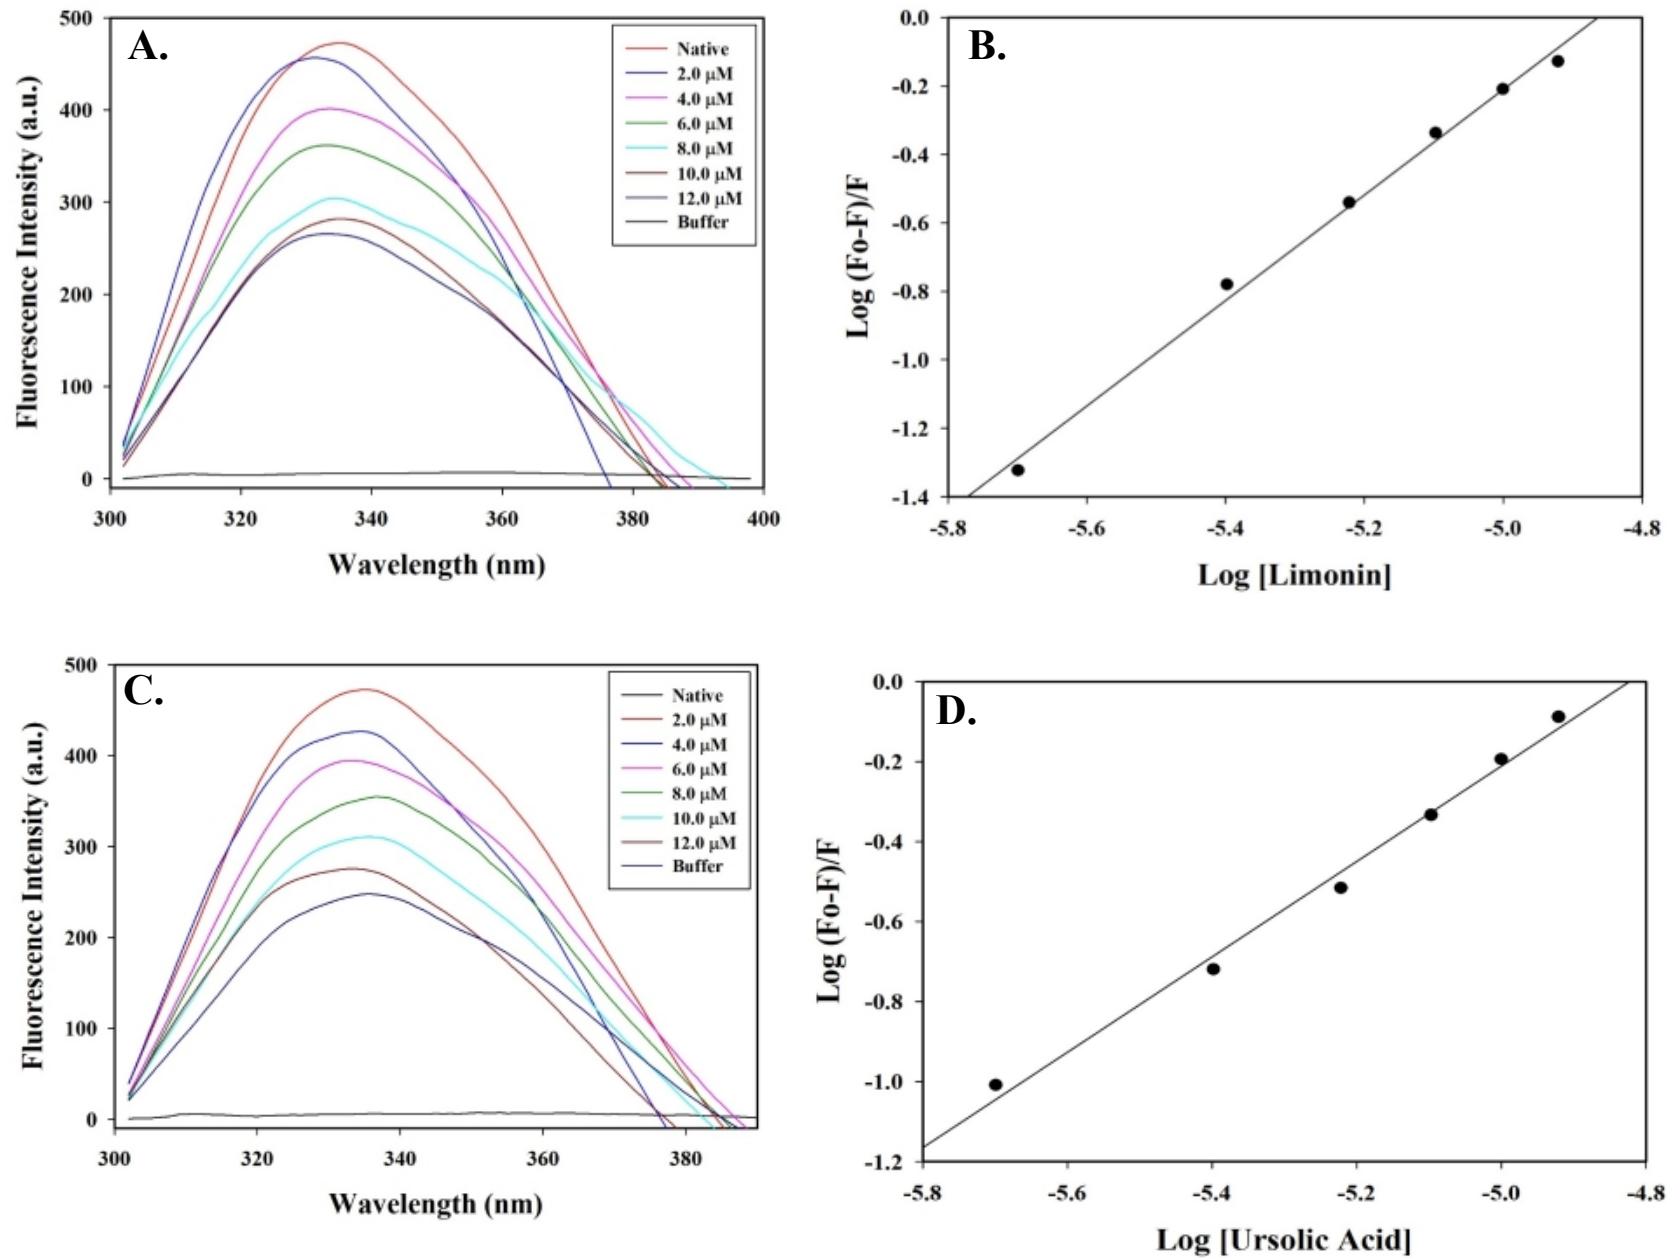

**Figure S5:** Fluorescence emission spectrum of (A) Limonin and (C) Ursolic acid. Stern Volmer plot of (B) Limonin and (D) Ursolic acid binding to the PDK3.

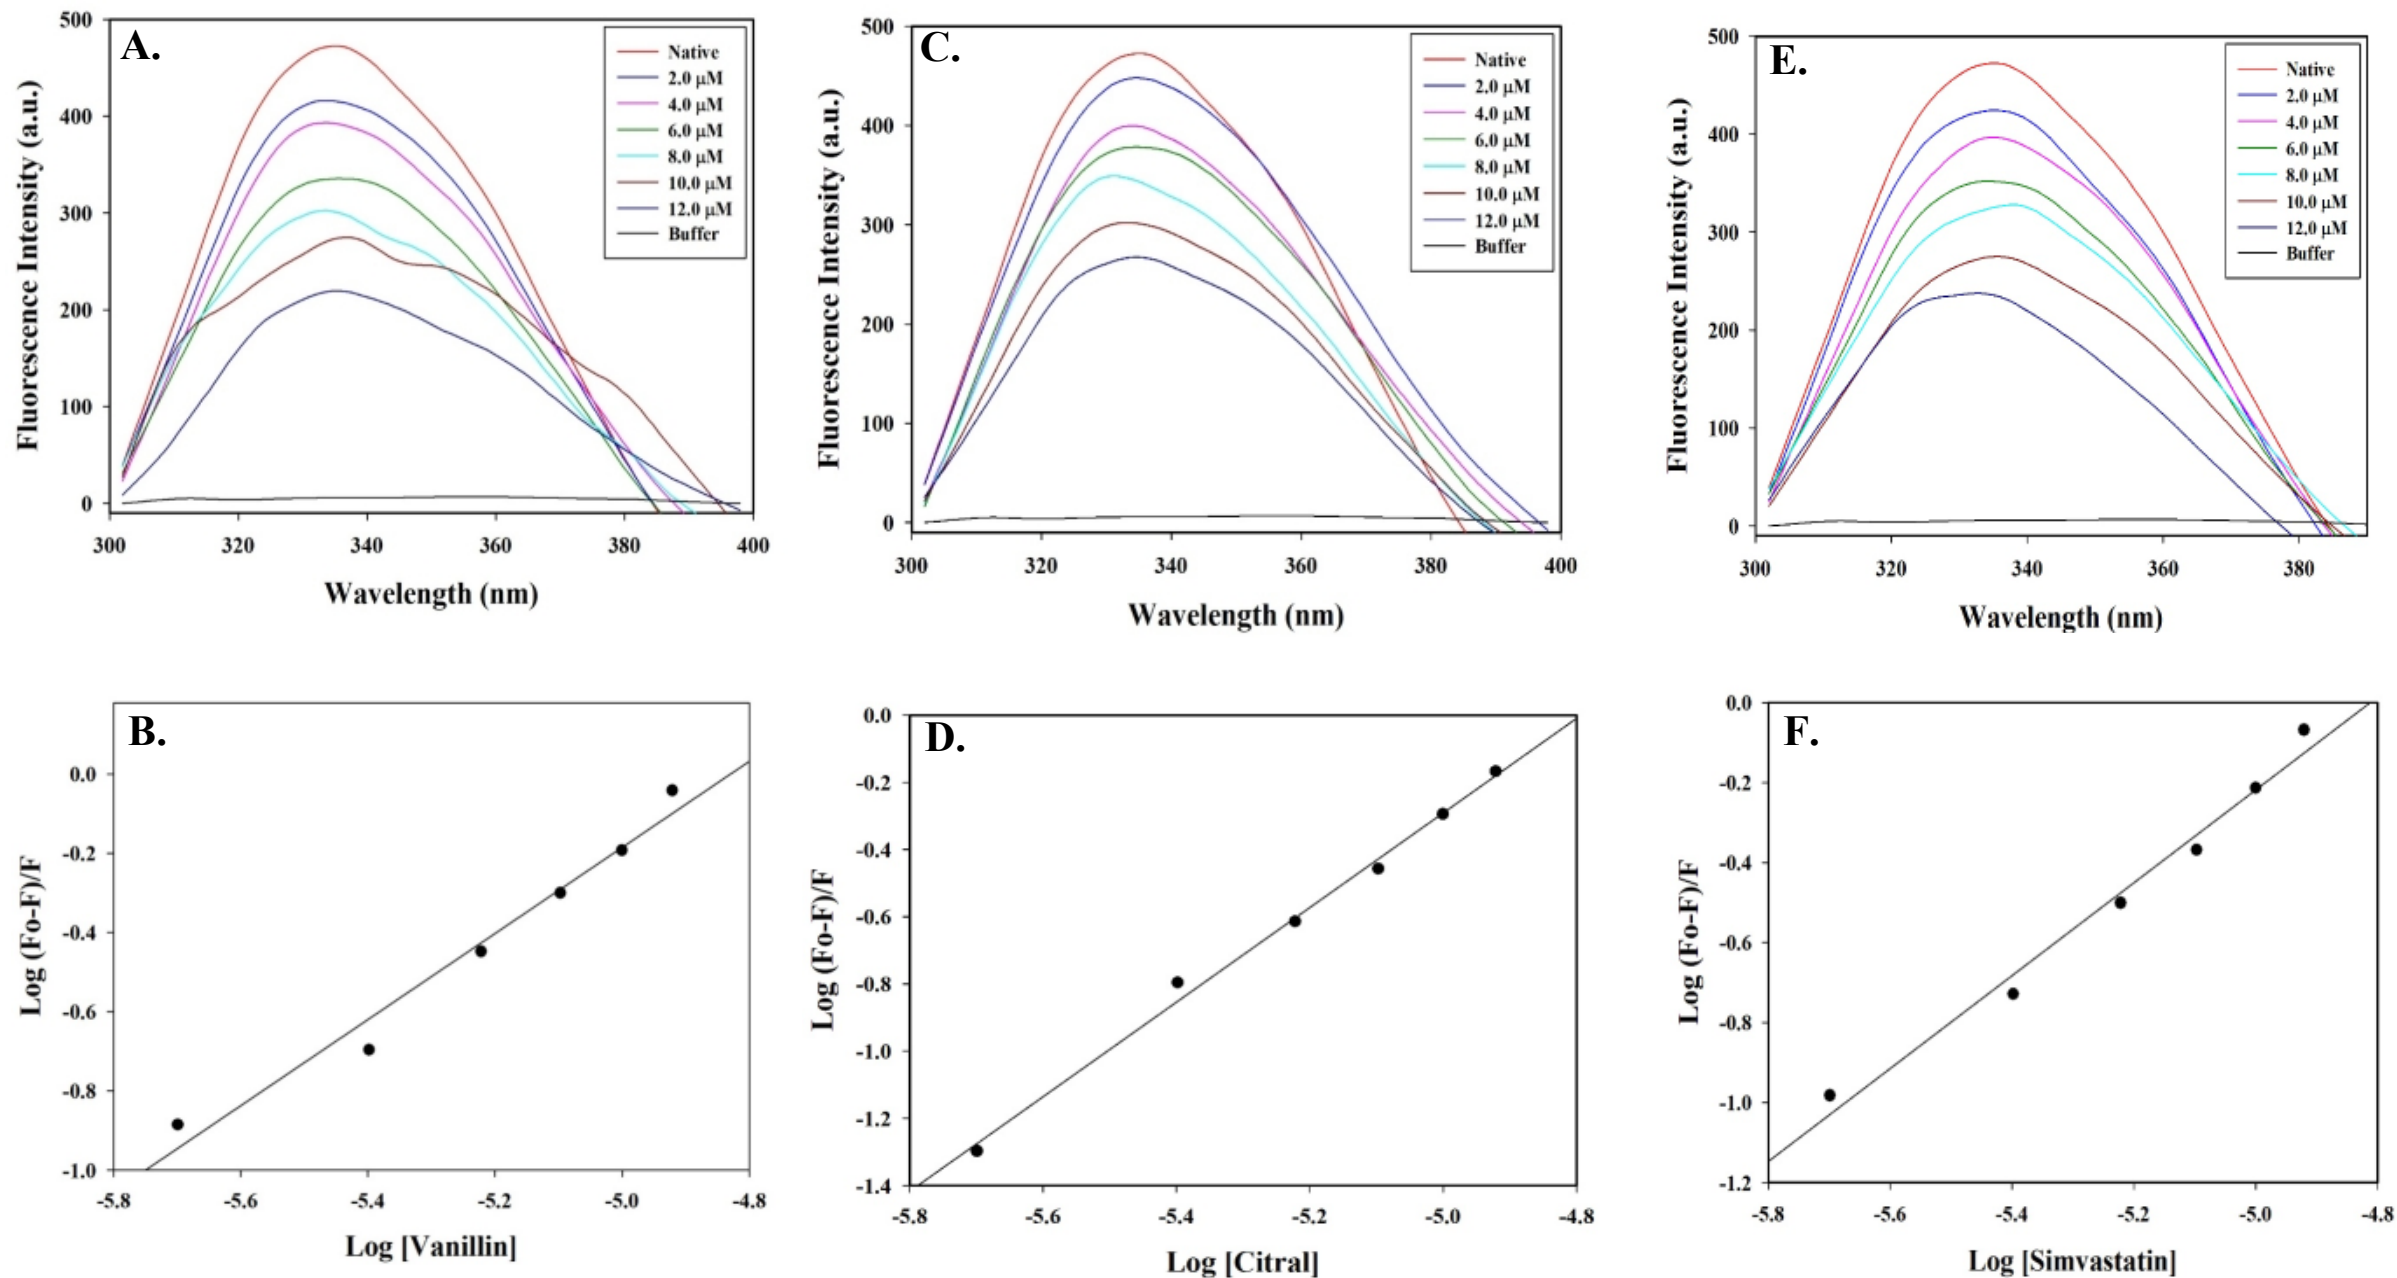

**Figure S6:** Fluorescence emission spectrum of (A) Vanillin and (C) Citral and (E) Simvastatin. Stern Volmer plot of (B) Vanillin (D) Citral and (F) Simvastatin binding to the PDK3.

**Table S1:** Percentage of residues participated in average structure formation.

\*Structure =  $\alpha$ -helix +  $\beta$ -sheet +  $\beta$ -bridge + Turn

| Complexes                | Percentage of protein secondary structure (SS %) |      |                |                 |      |      |                 |
|--------------------------|--------------------------------------------------|------|----------------|-----------------|------|------|-----------------|
|                          | Structure*                                       | Coil | $\beta$ -sheet | $\beta$ -bridge | Bend | Turn | $\alpha$ -helix |
| <b>PDK3</b>              | 73                                               | 18   | 13             | 2               | 9    | 7    | 51              |
| <b>PDK3-Ellagic acid</b> | 71                                               | 19   | 13             | 1               | 10   | 7    | 50              |
